# Supplementary material for: Higher Accuracy of Lung Ultrasound over Chest X-ray for Early Diagnosis of COVID-19 Pneumonia
Source: MDPI journal article supplement (doi:10.3390/ijerph18073481), 2021-03-27
Supplement: s1 [file s1]

**TITLE: Higher accuracy of lung ultrasound over chest X-ray for early COVID-19 diagnosis**

Javier Martínez Redondo, Carles Comas Rodríguez, Jesús Pujol Salud, Montserrat Crespo Pons, Cristina García Serrano, Marta Ortega Bravo, Jose María Palacín Peruga

**Javier Martínez Redondo, MD**

General Practitioner Balaguer Primary Care Center, Institut Català de la Salut (ICS), Lleida, Spain

**Carles Comas Rodríguez, PhD**

Mathematician, Department of Mathematics, Campus Capponet, University of Lleida (UdL) Lleida, Spain

**Jesús Pujol Salud, PhD**

General Practitioner, Balaguer Primary Care Center, Institut Català de la Salut (ICS), Lleida, Spain

General Practitioner, Universitat de Lleida (UdL). Biomedical Research Institute (IRB Lleida), Lleida, Spain

**Montserrat Crespo Pons, BSc**

Nurse, Balaguer Primary Care Center, Institut Català de la Salut (ICS), Lleida, Spain

**Cristina García Serrano, BSc**

Nurse, Balaguer Primary Care Center, Institut Català de la Salut (ICS), Lleida, Spain

Nurse, Research Group in Therapies in Primary Care (GRETAPS), Lleida, Spain

**Marta Ortega Bravo, PhD**

General Practitioner, Research Group in Therapies in Primary Care (GRETAPS), Lleida, Spain

General Practitioner, Research Support Unit Lleida, Fundació Institut Universitari per a la recerca a l'Atenció Primària de Salut Jordi Gol i Gurina (IDIAPJGol), Lleida, Spain

**Jose María Palacín Peruga, MD**

General Practitioner, Onze de Setembre Primary Care Center, Institut Català de la Salut (ICS), Lleida, Spain.

**\*Corresponding authors:**

Jose María Palacín Peruga, MD

Onze de Setembre Primary Care Center, Institut Català de la Salut (ICS)

Passeig Onze de Setembre, 10, Lleida, 25005, Spain.

[jpalacinp.lleida.ics@gencat.cat](mailto:jpalacinp.lleida.ics@gencat.cat)

Marta Ortega Bravo, PhD

Research Support Unit Lleida

Rambla Ferran, 44, Lleida, 25007, Spain.

[mortega.lleida.ics@gencat.cat](mailto:mortega.lleida.ics@gencat.cat)

## **Abstract**

**Background:** The COVID-19 pandemic rapidly strained healthcare systems worldwide. The reference standard for diagnosis is a positive reverse transcription polymerase chain reaction (RT-PCR) test, but results are not immediate, and sensibility is variable.

**Aim:** To evaluate the diagnostic accuracy of lung ultrasound compared to chest X-ray for COVID-19.

**Design and Setting:** A retrospective analysis of symptomatic patients admitted into one primary care centre in Spain between March and September 2020.

**Method:** Patients' chest X-rays and lung ultrasounds were categorised as normal or pathologic. RT-PCR confirmed COVID-19 infection. Pathologic lung ultrasound images were further categorised as showing either local or diffuse interstitial disease. McNemar and Fisher tests were used to compare diagnostic accuracy.

**Results:** Most of the 212 patients presented fever at admission, either as a standalone symptom (37.74% of patients) or together with others (72.17% of patients). The positive predictive value of lung ultrasound was 90% for diffuse interstitial pattern and 46.92% for local pattern. Lung ultrasound had a significantly higher sensitivity (82.75%) ( $P<0.001$ ), but lower specificity (71%) than chest X-ray (54.02% and 86%, respectively) ( $P=0.008$ ) for identifying interstitial lung disease. Moreover, the sensitivity of lung ultrasound for severe interstitial disease was 100%, and was significantly higher than chest X-ray (58.33%) ( $P=0.002$ ).

**Conclusion:** Lung ultrasound is more accurate than chest X-ray for identifying patients infected with COVID-19 and it is especially useful for those presenting diffuse interstitial disease.

**Keywords:** general practice, lung ultrasonography, thoracic radiography, COVID-19
